# Supplementary material for: Lactobacillus plantarum surface-displayed FomA (Fusobacterium nucleatum) protein generally stimulates protective immune responses in mice
Source: PubMed Central journal article supplement (PMC10548212; doi:10.3389/fmicb.2023.1228857), 2023-09-20
Supplement: Data_Sheet_1.pdf [file Data_Sheet_1.pdf]

## 1. FomA gene order

The gene sequence of the FomA protein (NCBI number: X72583.2) was searched through the NCBI website for the following base codes.

```
ATGAAAAAATTAGCATTAGTATTAGGTTTATTATTAGTAGTTGGATCAGTTGC
ATCAGCTAAAGAAGTTATGCCTGCACCTACTCCAGCTCCTGAAAAAGTAGT
AGAATATGTTGAAAAACCAGTTATAGTTTACAGAGACAGAGAAGTTGCTCC
AGCTTGGAGACCAAATGGTTCAGTAGATGTTCAATACAGATGGTATGGAGA
AGTTGAAAAGAAAAATCCAAAAGATGATAAAGATGAAAACCTGGGCAACTG
GTAAAGTAAATGCCGGAAGATTACAACTTTAACAAAAGTAACTTTACTG
AAAAACAACTTTAGAAGTAAGAACAAGAAATCATCATACTTTAAATGATA
CAGATGCAAATAACAAGAAATCAAATGGAGCAGCTGATGAATATAGATTAA
GACACTTCTATAACTTTGGAAAGTTAGGTTTCATCTAAAGTTAATGCTACTTC
AAGAGTAGAATTTAAACAAAAACAAATGATGGAGAAAAATCTTTAGGAG
CATCAGTATTATTTGATTTTGCTGATTATATCTATTCTAACAATTTCTTTAAAG
TTGATAAATTAGGATTAAGACCAGGATATAAATATGTATGGAAAGGACATGG
AAATGGTGAAGAAGGAACCTACAGTTCATAATGAATATCATTTAGCATT
GAATCTGATTTACATTACCATTAACTTTGCTTTAACTTAGAATATGATTT
ATCTTATAACAGATATAGAGAAAAATTCGAAACAACAGATGGATTAAAGAA
AGCTGAATGGTATGGTGAATTAACAGCTGTACTTTCTAACTACACTCCATTAT
ATAAAGCAGGGGCATTTGAATTAGGATTCAATGCTGAAGGTGGATATGATAC
TTACAATATGCACCAATATAAGAGAATTGGTGGAGAAGATGGAACCTTCTGTT
GACAGAAGAGACTATGAATTATACTTAGAACCAACTCTACAAGTTTCTTATA
AACCAACAGATTTTCGTAAAACCTATATGCAGCAGCAGGAGCTGACTACAGAA
ATAGAATTACTGGAGAATCAGAAGTTAAGAGATGGAGATGGCAACCAACTG
CTTCGGCTGGTATGAAAGTTACTTTCTAA
```

## 2. FomA gene sequence optimization

To better express FomA protein, we optimized the gene sequence of TomA and added the restriction site sequence and HA tag gene in Shanghai Biotech Company, and the synthetic sequence results are as follows.

```
TCTAGAATGTACCCATACGATGTTCCAGATTACGCTAAAAAACTGGCGCTGG
TTCTGGGTCTGCTGCTGGTTGTTGGTTCTGTTGCGAGCGCGAAAGAAGTTA
TGCCGGCGCCGACCCCGGCGCCGAAAAAGTTGTTGAATATGTTGAAAAA
CCGGTTATCGTTTACCGTGATCGTGAAGTTGCGCCGGCGTGGCGTCCGAAC
GGTAGCGTTGATGTTTCAGTACCGTTGGTACGGTGAAGTTGAAAAGAAAAA
CCCGAAAGATGATAAAGATGAAAACCTGGGCTACCGGTAAAGTGAACGCGG
GCCGTCTGCAGACCCTGACCAAAGTTAACTTCACCGAAAAACAGACCCTG
GAAGTTCGTACCCGTAACCACCACACCCTGAACGATACCGATGCTAACAAAC
AAAAAATCTAACGGCGCGGCTGATGAATACCGTCTGCGTCACTTCTACAAC
TTCGGTAAACTGGGCAGCTCTAAAGTTAACGCTACCTCTCGTGTTGAATTC
AAACAGAAAACCAACGATGGTAAAAAAGCCTGGGCGCGAGCGTTCTGTT
```

CGATTTTCGCGGATTACATCTACTCTAACAACCTTCTTCAAAGTTGATAAACTG  
GGTCTGCGTCCGGGCTACAAATACGTGTGGAAAGGCCACGGTAACGGTGA  
AGAAGGTACCCCGACTGTTTACAACGAATACCACCTGGCGTTCGAATCTGA  
TTTACCCCTGCCGTTCAACTTCGCGCTGAACCTGGAATACGATCTGAGCTA  
CAACCGTTACCGTGAAAAATTCGAAACCACCGATGGCCTGAAAAAAGCGG  
AATGGTACGGTGAACCTGACCGCGGTTCTGAGCAACTACACCCCGCTGTATA  
AAGCGGGCGCATTTCGAACTGGGTTTCAACGCGGAAGGCGGCTACGACACC  
TACAACATGCACCAGTACAAACGTATCGGTGGTGAAGATGGTACCAGCGTT  
GATCGTCGTGATTACGAACTGTACCTGGAACCGACCCTGCAGGTTTCCTAC  
AAACCGACCGATTTTCGTTAAACTGTACGCGGCAGCGGGTGC GGATTACCGT  
AACCGTATCACCGGTGAATCTGAAGTTAAACGTTGGCGTTGGCAGCCGACC  
GCGAGCGCGGGTATGAAAGTTACCTTCTAAAAGCTT

### 3. Comments for pSIP409

Puc is an essential gene for replication in *E. coli*, 256 rep is a necessary gene for replication in *Lactobacillus* NC8, And ermL is the erythromycin resistance gene, PspIP Is the gene inducing the expression of SPPK and SPPR genes, SPPK and SPPR can further induce the expression of the target genes, Tcat194 and TsaiA are terminator, Porfx is the promoter to induce the expression of the target genes, The TpepN is the terminator.

### 4. Primer design

To construct the *E. coli* expression vector for FomA gene fragments with restriction sites XhoI and NdeI, upstream and downstream primers were first designed for PCR amplification according to the FomA gene sequence, retaining the promoter, removing the terminator, adding the NdeI restriction site at the upstream 5' end and the XhoI restriction site at the downstream 5' end.

F:CGCATAATGTACCCATACGATGTTCCAGATT  
R:CTCGAGTTAGAAGGTAACCTTTCATACCCGC
